# Supplementary material
Source: Springer Nature journal article supplement (https://www.springermedizin.de/resource/supplementary/13601_2014_1058_MOESM2_ESM.pdf/9678622)
Supplement: MOESM2 [file 9678622]

## Additional File 2 - Summary of the included studies

Table 1: Summary of the included studies (n=117) by definition of asthma

|                                                                      | Lifetime asthma<br>[1-34]                                                                                                                                                                                                                                                | Diagnosed asthma [2, 4,<br>17, 21-26, 30, 31, 33, 35-<br>76]                                                                                                                                                                                                                                                | Current asthma<br>[2-4, 7, 9, 17, 21, 22, 29, 40,<br>41, 47, 54, 56, 63, 67, 70, 71,<br>75-117]                                                                                                                                                                     |
|----------------------------------------------------------------------|--------------------------------------------------------------------------------------------------------------------------------------------------------------------------------------------------------------------------------------------------------------------------|-------------------------------------------------------------------------------------------------------------------------------------------------------------------------------------------------------------------------------------------------------------------------------------------------------------|---------------------------------------------------------------------------------------------------------------------------------------------------------------------------------------------------------------------------------------------------------------------|
| <b>Papers, n</b>                                                     | 34                                                                                                                                                                                                                                                                       | 54                                                                                                                                                                                                                                                                                                          | 61                                                                                                                                                                                                                                                                  |
| <b>Operational definitions, n</b>                                    | 8                                                                                                                                                                                                                                                                        | 12                                                                                                                                                                                                                                                                                                          | 29                                                                                                                                                                                                                                                                  |
| <b>Prevalence of asthma, %</b>                                       | 1.4-28.2                                                                                                                                                                                                                                                                 | 1.0-38.6                                                                                                                                                                                                                                                                                                    | 1.5-29.4                                                                                                                                                                                                                                                            |
| <b>Questionnaires used</b>                                           | ATS<br>ECRHS<br>FinEsS<br>ISAAC<br>MRC<br>NHIS<br>OLIN                                                                                                                                                                                                                   | ATS<br>ATS-DLD<br>BOLD<br>BPAS<br>CRQ<br>ECRHS<br>FinEsS<br>GEIRD<br>ISAAC<br>MRC<br>National asthma<br>prevalence study<br>(Bangladesh)<br>PNAD<br>National Maternal and<br>Infant Health Survey<br>NHANES<br>OLIN<br>WHS                                                                                  | ATS<br>ATS-DLD<br>BOLD<br>ECRHS<br>ISAAC<br>IUATLD<br>MRC<br>National asthma prevalence<br>study (Bangladesh)<br>NCHS<br>NFHS<br>NHANES<br>NHIS<br>NYC-NAAS<br>PNAD                                                                                                 |
| <b>Country/Region</b>                                                | Austria<br>Australia<br>Brazil<br>Canada<br>China<br>Cyprus<br>Denmark<br>Greece<br>Italy<br>Japan<br>Norway<br>Portugal<br>Scandinavia and<br>Eastern Europe<br>South Korea<br>Spain<br>Sweden<br>United Arab<br>Emirates<br>United Kingdom<br>United States<br>Vietnam | Australia<br>Bangladesh<br>Brazil<br>Canada<br>China<br>Colombia<br>Croatia<br>Finland<br>Germany<br>Greece<br>Iran<br>Japan<br>New Zealand<br>Portugal<br>Saudi Arabia<br>Serbia and Montenegro<br>Singapore<br>South Korea<br>Sweden<br>Thailand<br>United Kingdom<br>United States<br>Ukraine<br>Vietnam | Australia<br>Bangladesh<br>Brazil<br>Canada<br>Croatia<br>Ecuador<br>European Community<br>Greece<br>India<br>Ireland<br>Japan<br>Peru<br>Portugal<br>Rwanda<br>South Korea<br>Spain<br>Sweden<br>Turkey<br>United Arab Emirates<br>United Kingdom<br>United States |
| <b>Data collection /<br/>questionnaire<br/>administration method</b> | Telephone<br>Post<br>School<br>Door-to-door                                                                                                                                                                                                                              | Telephone<br>Post<br>School<br>Primary care unit<br>Door-to-door<br>Mobile unit                                                                                                                                                                                                                             | Telephone<br>Post<br>School<br>Primary care unit<br>Door-to-door<br>Mobile unit<br>Public place                                                                                                                                                                     |

The asthma definitions were grouped into 3 general subgroups: lifetime asthma (if the respondent reported ever having had asthma), diagnosed asthma (if the respondent reported asthma diagnosed by a health professional) and current asthma (if the respondent reported having had asthma features in the 12 months prior to the interview). ATS, American Thoracic Society; ATS-DLD, American Thoracic Society-Division of Lung Disease; BOLD, Burden of Lung Disease; BPAS, Brief Pediatric Asthma Screen; CSGA, Collaborative Studies on the Genetics of Asthma; CRQ, Children's Respiratory Questionnaire; ECRHS, European Community Respiratory Health Survey; FinEsS, Finnish, Estonian and Swedish respiratory Survey; ISAAC, International Study of Asthma and Allergies in Childhood; IUATLD, International Union Against Tuberculosis and Lung Disease; MRC, Medical Research Council respiratory questionnaire; NCHS, Five data sources from the National Center for Health Statistics; NFHS, National Family Health Survey; NHANES, National Health and Nutrition Examination Survey; NHIS, National Health Interview Survey; NYC-NAAS, New York City – Neighborhood Asthma and Allergy Study; PNAD, National Household Sample Survey-Pesquisa Nacional por Amostra de Domicílios; OLIN, Obstructive Lung Disease In Northern Sweden; WHS, World Health Survey.

**Table 2: The 117 included papers by Average citation per year by the end of 2013.**

| First Author      | Year | Journal                                                        | Times cited | Average citations per year |
|-------------------|------|----------------------------------------------------------------|-------------|----------------------------|
| Pearce, N.        | 2007 | Thorax                                                         | 291         | 41.57                      |
| Asher, M. I.      | 1998 | European Respiratory Journal                                   | 644         | 40.25                      |
| Akinbami, L. J.   | 2002 | Pediatrics                                                     | 408         | 34                         |
| Burney, P.        | 1996 | European Respiratory Journal                                   | 514         | 28.56                      |
| Burr, M. L.       | 1989 | Archives Of Disease In Childhood                               | 644         | 25.76                      |
| Burney, P. G. J.  | 1990 | British Medical Journal                                        | 482         | 20.08                      |
| Moorman, J. E.    | 2011 | Morbidity And Mortality Weekly Report. Surveillance Summaries  | 59          | 19.67                      |
| Vonmutius, E.     | 1992 | British Medical Journal                                        | 331         | 15.05                      |
| Gergen, P. J.     | 1988 | Pediatrics                                                     | 383         | 14.73                      |
| Robertson, C. F.  | 1991 | British Medical Journal                                        | 313         | 13.61                      |
| Weitzman, M.      | 1992 | JAMA-Journal Of The American Medical Association               | 280         | 12.73                      |
| Upton, M. N.      | 2000 | British Medical Journal                                        | 178         | 12.71                      |
| Crain, E. F.      | 1994 | Pediatrics                                                     | 247         | 12.35                      |
| Mortz, C. G.      | 2001 | British Journal Of Dermatology                                 | 154         | 11.85                      |
| Kaur, B.          | 1998 | British Medical Journal                                        | 177         | 11.06                      |
| To, T.            | 2012 | BMC Public Health                                              | 22          | 11                         |
| Galassi, C.       | 2006 | Pediatrics                                                     | 85          | 10.63                      |
| Litonjua, A. A.   | 1999 | Pediatric Pulmonology                                          | 148         | 9.87                       |
| Downs, S. H.      | 2001 | Archives Of Disease In Childhood                               | 126         | 9.69                       |
| Anderson, H. R.   | 1994 | British Medical Journal                                        | 187         | 9.35                       |
| Haby, M. M.       | 2001 | Thorax                                                         | 121         | 9.31                       |
| Woolcock, A. J.   | 1987 | Thorax                                                         | 243         | 9                          |
| Zollner, I. K.    | 2005 | Thorax                                                         | 81          | 9                          |
| Arif, A. A.       | 2003 | European Respiratory Journal                                   | 93          | 8.45                       |
| Akinbami, L. J.   | 2011 | National Health Statistics Reports                             | 25          | 8.33                       |
| Rodriguez, M. A.  | 2002 | Archives Of Pediatrics & Adolescent Medicine                   | 99          | 8.25                       |
| Pearce, N.        | 2000 | European Respiratory Journal                                   | 112         | 8                          |
| Strachan, D. P.   | 1994 | Archives Of Disease In Childhood                               | 155         | 7.75                       |
| Bjorksten, B.     | 1998 | European Respiratory Journal                                   | 120         | 7.5                        |
| Miller, J. E.     | 2000 | American Journal Of Public Health                              | 105         | 7.5                        |
| Leung, R.         | 1997 | European Respiratory Journal                                   | 118         | 6.94                       |
| Guo, Y. L. L.     | 1999 | Environmental Health Perspectives                              | 103         | 6.87                       |
| Goh, D. Y. T.     | 1996 | Archives Of Disease In Childhood                               | 118         | 6.56                       |
| Peat, J. K.       | 1992 | British Medical Journal                                        | 141         | 6.41                       |
| Joseph, C. L. M.  | 1996 | Journal Of Pediatrics                                          | 105         | 5.83                       |
| Oraka, E.         | 2010 | Chest                                                          | 23          | 5.75                       |
| Kwon, J.-W.       | 2011 | Allergy Asthma & Immunology Research                           | 17          | 5.67                       |
| Bjerg, A.         | 2010 | Allergy                                                        | 22          | 5.5                        |
| Krstic, G.        | 2011 | Plos One                                                       | 16          | 5.33                       |
| Akinbami, L. J.   | 2010 | Environmental Research                                         | 21          | 5.25                       |
| Clifford, R. D.   | 1989 | Archives Of Disease In Childhood                               | 125         | 5                          |
| Waite, D. A.      | 1980 | Clinical Allergy                                               | 165         | 4.85                       |
| Studnicka, M.     | 1997 | European Respiratory Journal                                   | 81          | 4.76                       |
| Ma, J.            | 2010 | Allergy                                                        | 19          | 4.75                       |
| James, A. L.      | 2010 | European Respiratory Journal                                   | 19          | 4.75                       |
| Mak, H.           | 1982 | Journal Of Allergy And Clinical Immunology                     | 146         | 4.56                       |
| Wennergren, G.    | 2010 | Pediatric Allergy And Immunology                               | 16          | 4                          |
| Sanchez-Lerma, B. | 2012 | Journal Of Investigational Allergology And Clinical Immunology | 8           | 4                          |
| Arnedo-Pena, A.   | 2011 | International Journal Of Biometeorology                        | 11          | 3.67                       |
| Duggan, E. M.     | 2012 | Pediatric Allergy And Immunology                               | 7           | 3.5                        |
| Barry, A. C.      | 2010 | Journal Of Asthma                                              | 11          | 2.75                       |
| Fukutomi, Y.      | 2010 | International Archives Of Allergy And Immunology               | 10          | 2.5                        |
| Rodriguez, A.     | 2011 | Thorax                                                         | 7           | 2.33                       |
| Ekerljung, L.     | 2010 | International Journal Of Tuberculosis And Lung Disease         | 9           | 2.25                       |
| Bai, J.           | 2010 | Biomedical And Environmental Sciences                          | 9           | 2.25                       |
| Hansen, T. E.     | 2013 | Acta Paediatrica                                               | 2           | 2                          |
| Dell, S. D.       | 2010 | Canadian Respiratory Journal                                   | 8           | 2                          |
| Lukrafka, J. L.   | 2010 | Journal Of Asthma                                              | 8           | 2                          |
| Musafiri, S.      | 2011 | Respiratory Medicine                                           | 6           | 2                          |

| First Author                | Year | Journal                                                    | Times cited | Average citations per year |
|-----------------------------|------|------------------------------------------------------------|-------------|----------------------------|
| Chittleborough, C. R.       | 2010 | Respirology                                                | 6           | 1.5                        |
| Sa-Sousa, A.                | 2012 | Clinical And Translational Allergy                         | 3           | 1.5                        |
| Fukutomi, Y.                | 2011 | Allergology International                                  | 4           | 1.33                       |
| Julia-Serda, G.             | 2011 | International Journal Of Tuberculosis And Lung Disease     | 4           | 1.33                       |
| Sousa, S. I. V.             | 2011 | Environment International                                  | 4           | 1.33                       |
| Andrea Rodriguez, L.        | 2010 | Biomedica                                                  | 5           | 1.25                       |
| Wehrmeister, F. C.          | 2010 | Cadernos De Saude Publica                                  | 5           | 1.25                       |
| Frazier, J. C.              | 2012 | Preventing Chronic Disease                                 | 2           | 1                          |
| de Marco, R.                | 2013 | Plos One                                                   | 1           | 1                          |
| Agrawal, S.                 | 2012 | Journal Of Asthma                                          | 2           | 1                          |
| Koshy, G.                   | 2010 | Journal Of Public Health                                   | 4           | 1                          |
| Lam, H. T.                  | 2011 | Respiratory Medicine                                       | 3           | 1                          |
| Pegas, P. N.                | 2011 | Revista Portuguesa De Pneumologia                          | 3           | 1                          |
| Yeh, K.-W.                  | 2011 | Asian Pacific Journal Of Allergy And Immunology            | 3           | 1                          |
| Alves, G. d. C.             | 2012 | Cadernos De Saude Publica                                  | 2           | 1                          |
| Ekici, A.                   | 2012 | Journal Of Asthma                                          | 2           | 1                          |
| Fedortsiv, O.               | 2012 | Advances In Medical Sciences                               | 2           | 1                          |
| Robinson, C. L.             | 2012 | Bmj Open                                                   | 2           | 1                          |
| Kim, S. Y.                  | 2013 | Lung                                                       | 1           | 1                          |
| Alsowaidi, S.               | 2010 | Respiration                                                | 4           | 1                          |
| Ekerljung, L.               | 2010 | Clinical Respiratory Journal                               | 4           | 1                          |
| Delmas, M. C.               | 2012 | Revue Des Maladies Respiratoires                           | 2           | 1                          |
| Akinbami, L. J.             | 2012 | NCHS Data Brief                                            | 2           | 1                          |
| Kainu, A.                   | 2013 | Primary Care Respiratory Journal                           | 1           | 1                          |
| Jain, A.                    | 2010 | Indian Journal Of Pediatrics                               | 3           | 0.75                       |
| Anthracopoulos, M. B.       | 2011 | Allergy And Asthma Proceedings                             | 2           | 0.67                       |
| Anthracopoulos, M. B.       | 2011 | Acta Paediatrica                                           | 2           | 0.67                       |
| Bryant-Stephens, T.         | 2012 | Journal Of Asthma                                          | 1           | 0.5                        |
| Oraka, E.                   | 2012 | Journal Of Asthma                                          | 1           | 0.5                        |
| Al Ghobain, M. O.           | 2012 | Bmc Public Health                                          | 1           | 0.5                        |
| Gudelj, I.                  | 2012 | Medical Science Monitor                                    | 1           | 0.5                        |
| de Farias, M. R. d. C.      | 2010 | Brazilian Journal Of Epidemiology                          | 2           | 0.5                        |
| Parasuramalu, B. G.         | 2010 | Indian Journal Of Public Health                            | 2           | 0.5                        |
| Coker, T. R.                | 2012 | Health Services Research                                   | 1           | 0.5                        |
| Fiori, N. S.                | 2012 | Cadernos De Saude Publica                                  | 1           | 0.5                        |
| Matos Povoas Juca, S. C. B. | 2012 | Cadernos De Saude Publica                                  | 1           | 0.5                        |
| Kolokotroni, O.             | 2011 | BMC Public Health                                          | 1           | 0.33                       |
| de Luna, M. d. F. G.        | 2011 | Cadernos De Saude Publica                                  | 1           | 0.33                       |
| de Sousa, J. C.             | 2011 | BMC Public Health                                          | 1           | 0.33                       |
| Toledo, M. F.               | 2011 | Allergologia Et Immunopathologia                           | 1           | 0.33                       |
| Zivkovic, Z.                | 2010 | World Journal Of Pediatrics                                | 1           | 0.25                       |
| Shakurnia, A. H.            | 2010 | Eastern Mediterranean Health Journal                       | 1           | 0.25                       |
| Agrawal, S.                 | 2013 | International Journal Of Tuberculosis And Lung Disease     | 0           | 0                          |
| Broms, K.                   | 2013 | BMC Public Health                                          | 0           | 0                          |
| Bennoor, K. S.              | 2011 | Respirology                                                | 0           | 0                          |
| Cornell, A. G.              | 2011 | American Journal Of Respiratory And Critical Care Medicine | 0           | 0                          |
| de Luna, M. d. F. G.        | 2013 | Jornal Brasileiro De Pneumologia                           | 0           | 0                          |
| de Sousa, C. A.             | 2012 | Revista De Saude Publica                                   | 0           | 0                          |
| Hong, S.                    | 2012 | Environmental Health And Toxicology                        | 0           | 0                          |
| Hwang, G.-S.                | 2012 | Asia-Pacific Journal Of Public Health                      | 0           | 0                          |
| Jie, Y.                     | 2013 | Polish Journal Of Environmental Studies                    | 0           | 0                          |
| Lopez-Silvarrey-Varela, A.  | 2011 | Archivos De Bronconeumologia                               | 0           | 0                          |
| Mahboub, B. H.              | 2012 | Bmc Pulmonary Medicine                                     | 0           | 0                          |
| Moreira, S. M.              | 2010 | European Journal Of Medical Research                       | 0           | 0                          |
| Nriagu, J.                  | 2012 | Science Of The Total Environment                           | 0           | 0                          |
| Rerksuppaphol, S.           | 2012 | Pediatric Reports                                          | 0           | 0                          |
| Zahran, H. S.               | 2011 | JAMA-Journal Of The American Medical Association           | 0           | 0                          |
| Zobeiri, M.                 | 2011 | Acta Medica Iranica                                        | 0           | 0                          |

## References

1. Studnicka M, Hackl E, Pischinger J, Fangmeyer C, Haschke N, Kuhr J, Urbanek R, Neumann M, Frischer T: **Traffic-related NO<sub>2</sub> and the prevalence of asthma and respiratory symptoms in seven year olds.** *Eur Respir J* 1997, **10**:2275-2278.
2. Sa-Sousa A, Morais-Almeida M, Azevedo LF, Carvalho R, Jacinto T, Todo-Bom A, Loureiro C, Bugalho-Almeida A, Bousquet J, Fonseca JA: **Prevalence of asthma in Portugal - The Portuguese National Asthma Survey.** *Clin Transl Allergy* 2012, **2**:15-15.
3. de Farias MRdC, Rosa AM, Hacon SdS, de Castro HA, Ignotti E: **Prevalence of asthma in schoolchildren in Alta Floresta- a municipality in the southeast of the Brazilian Amazon.** *Rev Bras Epidemiol* 2010, **13**:49-57.
4. Fiori NS, Goncalves H, Dumith SC, Dropa Chrestani Cesar MA, Menezes AMB, Cardozo Macedo SE: **Ten-year trends in prevalence of asthma in adults in southern Brazil: comparison of two population-based studies.** *Cad Saude Publica* 2012, **28**:135-144.
5. Mortz CG, Lauritsen JM, Bindsvlev-Jensen C, Andersen KE: **Prevalence of atopic dermatitis, asthma, allergic rhinitis, and hand and contact dermatitis in adolescents. The Odense Adolescence Cohort Study on Atopic Diseases and Dermatitis.** *Br J Dermatol* 2001, **144**:523-532.
6. Kolokotroni O, Middleton N, Nicolaou N, Pipis S, Priftis KN, Milton DK, Yiallourous PK: **Temporal changes in the prevalence of childhood asthma and allergies in urban and rural areas of Cyprus: results from two cross sectional studies.** *Bmc Public Health* 2011, **11**.
7. Toledo MF, Rozov T, Leone C: **Prevalence of asthma and allergies in 13-to 14-year-old adolescents and the frequency of risk factors in carriers of current asthma in Taubate, Sao Paulo, Brazil.** *Allergol Immunopathol (Madr)* 2011, **39**:284-290.
8. Pearce N, Aiet-Khaled N, Beasley R, Mallol J, Keil U, Mitchell E, Robertson C, Grp IPTS: **Worldwide trends in the prevalence of asthma symptoms: phase III of the International Study of Asthma and Allergies in Childhood (ISAAC).** *Thorax* 2007, **62**:758-766.
9. Crain EF, Weiss KB, Bijur PE, Hersh M, Westbrook L, Stein REK: **An estimate of the prevalence of asthma and wheezing among inner-city children.** *Pediatrics* 1994, **94**:356-362.
10. Upton MN, McConnachie A, McSharry C, Hart CL, Smith GD, Gillis CR, Watt GCM: **Intergenerational 20 year trends in the prevalence of asthma and hay fever in adults: the Midspan family study surveys of parents and offspring.** *Br Med J* 2000, **321**:88-92.
11. Asher MI, Anderson HR, Stewart AW, Crane J, Ait-Khaled N, Anabwani G, Anderson HR, Beasley R, Bjorksten B, Burr ML, et al: **Worldwide variations in the prevalence of asthma symptoms: the International Study of Asthma and Allergies in Childhood (ISAAC).** *Eur Respir J* 1998, **12**:315-335.
12. Bjorksten B, Dumitrascu D, Foucard T, Khetsuriani N, Khaitov R, Leja M, Lis G, Pekkanen J, Priftanji A, Riikjarv MA: **Prevalence of**

- childhood asthma, rhinitis and eczema in Scandinavia and Eastern Europe.** *Eur Respir J* 1998, **12**:432-437.
13. Galassi C, De Sario M, Biggeri A, Bisanti L, Chellini E, Ciccone G, Petronio MG, Piffer S, Sestini P, Rusconi F, et al: **Changes in prevalence of asthma and allergies among children and adolescents in Italy: 1994-2002.** *Pediatrics* 2006, **117**:34-42.
  14. Leung R, Wong G, Lau J, Ho A, Chan JKW, Choy D, Douglass C, Lai CKW: **Prevalence of asthma and allergy in Hong Kong schoolchildren: An ISAAC study.** *Eur Respir J* 1997, **10**:354-360.
  15. Robertson CF, Heycock E, Bishop J, Nolan T, Olinsky A, Phelan PD: **PREVALENCE OF ASTHMA IN MELBOURNE SCHOOLCHILDREN - CHANGES OVER 26 YEARS.** *Br Med J* 1991, **302**:1116-1118.
  16. Pegas PN, Alves CA, Scotto MG, Evtuyugina MG, Pio CA, Freitas MC: **Risk factors and prevalence of asthma and rhinitis among primary school children in Lisbon.** *Rev Port Pneumol* 2011, **17**:109-116.
  17. Dell SD, Foty RG, Gilbert NL, Jerret M, To T, Walter SD, Stieb DM: **Asthma and allergic disease prevalence in a diverse sample of Toronto school children: results from the Toronto Child Health Evaluation Questionnaire (T-CHEQ) Study.** *Can Respir J* 2010, **17**:e1-6.
  18. Lopez-Silvarrey-Varela A, Pertega-Diaz S, Rueda-Esteban S, Manuel Sanchez-Lastres J, Angel San-Jose-Gonzalez M, Sampedro-Campos M, Perez-Castro T, Garnelo-Suarez L, Bamonde-Rodriguez L, Lopez-Silvarrey-Varela J, Gonzalez-Barcala J: **Prevalence and Geographic Variations in Asthma Symptoms in Children and Adolescents in Galicia (Spain).** *Arch Bronconeumol* 2011, **47**:274-282.
  19. Pearce N, Sunyer J, Cheng S, Chinn S, Bjorksten B, Burr M, Keil U, Anderson HR, Burney P, Com ISCE: **Comparison of asthma prevalence in the ISAAC and the ECRHS.** *Eur Respir J* 2000, **16**:420-426.
  20. Kaur B, Anderson HR, Austin J, Burr M, Harkins LS, Strachan DP, Warner JO: **Prevalence of asthma symptoms, diagnosis, and treatment in 12-14 year old children across Great Britain (international study of asthma and allergies in childhood, ISAAC UK).** *Br Med J* 1998, **316**:118-124.
  21. Fukutomi Y, Nakamura H, Kobayashi F, Taniguchi M, Konno S, Nishimura M, Kawagishi Y, Watanabe J, Komase Y, Akamatsu Y, et al: **Nationwide Cross-Sectional Population-Based Study on the Prevalences of Asthma and Asthma Symptoms among Japanese Adults.** *Int Arch Allergy Immunol* 2010, **153**:280-287.
  22. Ekerljung L, Andersson A, Sundblad BM, Ronmark E, Larsson K, Ahlstedt S, Dahlen SE, Lundback B: **Has the increase in the prevalence of asthma and respiratory symptoms reached a plateau in Stockholm, Sweden?** *Int J Tuberc Lung Dis* 2010, **14**:764-771.
  23. Ekerljung L, Sundblad B-M, Ronmark E, Larsson K, Lundback B: **Incidence and prevalence of adult asthma is associated with low socio-economic status.** *Clin Respir J* 2010, **4**:147-156.

24. Lam HT, Ronmark E, Tu'o'ng NV, Ekerljung L, Chuc NTK, Lundback B: **Increase in asthma and a high prevalence of bronchitis: results from a population study among adults in urban and rural Vietnam.** *Respir Med* 2011, **105**:177-185.
25. James AL, Knuiiman MW, Divitini ML, Hui J, Hunter M, Palmer LJ, Maier G, Musk AW: **Changes in the prevalence of asthma in adults since 1966: the Busselton health study.** *Eur Respir J* 2010, **35**:273-278.
26. Wennergren G, Ekerljung L, Alm B, Eriksson J, Lotvall J, Lundback B: **Asthma in late adolescence - farm childhood is protective and the prevalence increase has levelled off.** *Pediatr Allergy Immunol* 2010, **21**:806-813.
27. Arnedo-Pena A, Garcia-Marcos L, Fuertes Fernandez-Espinar J, Bercedo-Sanz A, Aguinaga-Ontoso I, Gonzalez-Diaz C, Carvajal-Uruena I, Busquet-Monge R, Morales Suarez-Varela M, Garcia de Andoin N, et al: **Sunny hours and variations in the prevalence of asthma in schoolchildren according to the International Study of Asthma and Allergies (ISAAC) Phase III in Spain.** *Int J Biometeorol* 2011, **55**:423-434.
28. Alsowaidi S, Abdulle A, Bernsen R: **Prevalence and Risk Factors of Asthma among Adolescents and Their Parents in Al-Ain (United Arab Emirates).** *Respiration* 2010, **79**:105-111.
29. Mak H, Johnston P, Abbey H, Talamo RC: **Prevalence of asthma and health-service utilization of asthmatic-children in an inner-city** *J Allergy Clin Immunol* 1982, **70**:367-372.
30. Hwang G-S, Choi J-W, Yoo Y, Choung J-T, Yoon C-S: **Residential Environmental Risk Factors for Childhood Asthma Prevalence in Metropolitan and Semirural Cities in Korea.** *Asia Pac J Public Health* 2012, **24**:58-67.
31. Guo YLL, Lin YC, Sung FC, Huang SL, Ko YC, Lai JS, Su HJ, Shaw CK, Lin RS, Dockery DW: **Climate, traffic-related air pollutants, and asthma prevalence in middle-school children in Taiwan.** *Environ Health Perspect* 1999, **107**:1001-1006.
32. Sousa SIV, Ferraz C, Alvim-Ferraz MCM, Martins FG, Vaz LG, Pereira MC: **Spirometric tests to assess the prevalence of childhood asthma at Portuguese rural areas: Influence of exposure to high ozone levels.** *Environ Int* 2011, **37**:474-478.
33. Koshy G, Delpisheh A, Brabin BJ: **Trends in prevalence of childhood and parental asthma in Merseyside, 1991-2006.** *Journal of Public Health* 2010, **32**:488-495.
34. Hansen TE, Evjenth B, Holt J: **Increasing prevalence of asthma, allergic rhinoconjunctivitis and eczema among schoolchildren: three surveys during the period 1985-2008.** *Acta Paediatr* 2013, **102**:47-52.
35. Zollner IK, Weiland SK, Piechotowski I, Gabrio T, von Mutius E, Link B, Pfaff G, Kouros B, Wuthe J: **No increase in the prevalence of asthma, allergies, and atopic sensitisation among children in Germany: 1992-2001.** *Thorax* 2005, **60**:545-548.
36. Kim SY, Jung JY, Park MS, Kang YA, Kim EY, Kim SK, Chang J, Kim YS: **Increased Prevalence of Self-Reported Asthma Among**

- Korean Adults: An Analysis of KNHANES I and IV Data.** *Lung* 2013, **191**:281-288.
37. Bjerg A, Sandstrom T, Lundback B, Ronmark E: **Time trends in asthma and wheeze in Swedish children 1996-2006: prevalence and risk factors by sex.** *Allergy* 2010, **65**:48-55.
  38. Bai J, Zhao J, Shen K-L, Xiang L, Chen A-H, Huang S, Huang Y, Wang J-S, Ye R-W: **Current Trends of the Prevalence of Childhood Asthma in Three Chinese Cities : A Multicenter Epidemiological Survey.** *Biomed Environ Sci* 2010, **23**:453-457.
  39. Peat JK, Haby M, Spijker J, Berry G, Woolcock AJ: **Prevalence of asthma in adults in Busselton, Western-Australia.** *Br Med J* 1992, **305**:1326-1329.
  40. Oraka E, Elizabeth HJ, King ME, Callahan DB: **Asthma Prevalence among US Elderly by Age Groups: Age Still Matters.** *J Asthma* 2012, **49**:593-599.
  41. Barry AC, Mannino DM, Hopenhayn C, Bush H: **Exposure to Indoor Biomass Fuel Pollutants and Asthma Prevalence in Southeastern Kentucky: Results From the Burden of Lung Disease (BOLD) Study.** *J Asthma* 2010, **47**:735-741.
  42. Kainu A, Pallasaho P, Piirila P, Lindqvist A, Sovijarvi A, Pietinalho A: **Increase in prevalence of physician-diagnosed asthma in Helsinki during the Finnish Asthma Programme: improved recognition of asthma in primary care? A cross-sectional cohort study.** *Prim Care Respir J* 2013, **22**:64-71.
  43. Al Ghobain MO, Al-Hajjaj MS, Al Moamary MS: **Asthma prevalence among 16-to 18-year-old adolescents in Saudi Arabia using the ISAAC questionnaire.** *Bmc Public Health* 2012, **12**.
  44. To T, Stanojevic S, Moores G, Gershon AS, Bateman ED, Cruz AA, Boulet L-P: **Global asthma prevalence in adults: findings from the cross-sectional world health survey.** *Bmc Public Health* 2012, **12**.
  45. Wehrmeister FC, de Anselmo Peres KG: **Regional inequalities in the prevalence of asthma diagnosis in children: an analysis of the Brazilian National Household Sample Survey, 2003.** *Cad Saude Publica* 2010, **26**:1839-1852.
  46. Strachan DP, Anderson HR, Limb ES, Oneill A, Wells N: **A national survey of asthma prevalence, severity, and treatment in Great-Britain.** *Arch Dis Child* 1994, **70**:174-178.
  47. Bennoor KS, Hassan MR, Hossain MA, Mahmud AM, Ahmad MM, Habib GM: **Trends of asthma in Bangladesh: findings of the national asthma prevalence study -1999 and 2010.** *Respirology* 2011, **16**:212-212.
  48. Andrea Rodriguez L, Jose Rey J, Berena Herrera A, Castro H, Niederbacher J, Maria Vera L, Libia Cala L, Bolivar F: **Respiratory symptoms associated with asthma prevalence and air pollution in preschool children.** *Biomedica* 2010, **30**:15-22.
  49. Goh DYT, Chew FT, Quek SC, Lee BW: **Prevalence and severity of asthma, rhinitis, and eczema in Singapore schoolchildren.** *Arch Dis Child* 1996, **74**:131-135.

50. Shakurnia AH, Assar S, Afra M, Latifi M: **Prevalence of asthma among schoolchildren in Ahvaz, Islamic Republic of Iran.** *East Mediterr Health J* 2010, **16**:651-656.
51. Fedortsiv O, Brozek GM, Luchyshyn N, Kubey I, Lawson JA, Rennie DC, Zejda JE: **Prevalence of childhood asthma, rhinitis, and eczema in the Ternopil region of Ukraine - results of BUPAS study.** *Adv Med Sci* 2012, **57**:282-289.
52. Vonmutius E, Fritzscht C, Weiland SK, Roll G, Magnussen H: **Prevalence of asthma and allergic disorders among children in United Germany - a descriptive comparison.** *Br Med J* 1992, **305**:1395-1399.
53. Litonjua AA, Carey VJ, Weiss ST, Gold DR: **Race, socioeconomic factors, and area of residence are associated with asthma prevalence.** *Pediatr Pulmonol* 1999, **28**:394-401.
54. Rodriguez MA, Winkleby MA, Ahn D, Sundquist J, Kraemer HC: **Identification of population subgroups of children and adolescents with high asthma prevalence - Findings from the Third National Health and Nutrition Examination Survey.** *Arch Pediatr Adolesc Med* 2002, **156**:269-275.
55. Nriagu J, Martin J, Smith P, Socier D: **Residential hazards, high asthma prevalence and multimorbidity among children in Saginaw, Michigan.** *Sci Total Environ* 2012, **416**:53-61.
56. Haby MM, Peat JK, Marks GB, Woolcock AJ, Leeder SR: **Asthma in preschool children: prevalence and risk factors.** *Thorax* 2001, **56**:589-595.
57. Downs SH, Marks GB, Sporik R, Belosouva EG, Car NG, Peat JK: **Continued increase in the prevalence of asthma and atopy.** *Arch Dis Child* 2001, **84**:20-23.
58. Lukrafka JL, Fuchs SC, Moreira LB, Picon RV, Fischer GB, Fuchs FD: **Performance of the ISAAC Questionnaire to Establish the Prevalence of Asthma in Adolescents: A Population-Based Study.** *J Asthma* 2010, **47**:166-169.
59. Miller JE: **The effects of race/ethnicity and income on early childhood asthma prevalence and health care use.** *Am J Public Health* 2000, **90**:428-430.
60. Zobeiri M: **Prevalence, risk factors and severity of asthma symptoms in children of Kermanshah, IRAN: ISAAC phase I, II.** *Acta Med Iran* 2011, **49**:184-188.
61. Yeh K-W, Ou L-S, Yao T-C, Chen L-C, Lee W-I, Huang J-L, Grp PS: **Prevalence and risk factors for early presentation of asthma among preschool children in Taiwan.** *Asian Pac J Allergy Immunol* 2011, **29**:120-126.
62. Joseph CLM, Foxman B, Leickly FE, Peterson E, Ownby D: **Prevalence of possible undiagnosed asthma and associated morbidity among urban schoolchildren.** *J Pediatr* 1996, **129**:735-742.
63. Kwon J-W, Kim B-J, Song Y, Seo J-H, Kim T-H, Yu J, Kim HB, Lee SY, Kim W-K, Kim K-W, et al: **Changes in the Prevalence of Childhood Asthma in Seoul from 1995 to 2008 and Its Risk Factors.** *Allergy Asthma Immunol Res* 2011, **3**:27-33.



64. Gergen PJ, Mullally DI, Evans R: **National survey of prevalence of asthma among children in United-States, 1976 to 1980.** *Pediatrics* 1988, **81**:1-7.
65. Jie Y, Isa ZM, Jie X, Ismail NH: **Asthma and Asthma-Related Symptoms among Adults of an Acid Rain-Plagued City in Southwest China: Prevalence and Risk Factors.** *Pol J Environ Stud* 2013, **22**:717-726.
66. Rerksuppaphol S, Rerksuppaphol L: **Carotenoid intake and asthma prevalence in Thai children.** *Pediatr Rep* 2012, **4**:e12-e12.
67. Fukutomi Y, Taniguchi M, Watanabe J, Nakamura H, Komase Y, Ohta K, Akasawa A, Nakagawa T, Miyamoto T, Akiyama K: **Time trend in the prevalence of adult asthma in Japan: findings from population-based surveys in Fujieda City in 1985, 1999, and 2006.** *Allergol Int* 2011, **60**:443-448.
68. de Marco R, Pesce G, Marcon A, Accordini S, Antonicelli L, Bugiani M, Casali L, Ferrari M, Nicolini G, Panico MG, et al: **The Coexistence of Asthma and Chronic Obstructive Pulmonary Disease (COPD): Prevalence and Risk Factors in Young, Middle-aged and Elderly People from the General Population.** *Plos One* 2013, **8**.
69. Bryant-Stephens T, West C, Dirl C, Banks T, Briggs V, Rosenthal M: **Asthma Prevalence in Philadelphia: Description of Two Community-Based Methodologies to Assess Asthma Prevalence in an Inner-City Population.** *J Asthma* 2012, **49**:581-585.
70. Hong S, Son DK, Lim WR, Kim SH, Kim H, Yum HY, Kwon H: **The prevalence of atopic dermatitis, asthma, and allergic rhinitis and the comorbidity of allergic diseases in children.** *Environ Health Toxicol* 2012, **27**:e2012006-e2012006.
71. Gudelj I, Mrkic Kobal I, Munivrana Skvorc H, Mise K, Vrbica Z, Plavec D, Tudoric N: **Intraregional differences in asthma prevalence and risk factors for asthma among adolescents in Split-Dalmatia County, Croatia.** *Med Sci Monit* 2012, **18**:PH43-50.
72. Waite DA, Eyles EF, Tonkin SL, Odonnell TV: **Asthma prevalence in Tokelauan children in 2 environments.** *Clin Allergy* 1980, **10**:71-75.
73. de Sousa JC, Santo ME, Colaco T, Almada-Lobo F, Yaphe J: **Asthma in an Urban Population in Portugal: A prevalence study.** *Bmc Public Health* 2011, **11**.
74. Zivkovic Z, Vukasinovic Z, Cerovic S, Radulovic S, Zivanovic S: **Prevalence of childhood asthma and allergies in Serbia and Montenegro.** *World J Pediatr* 2010, **6**:331-336.
75. Anthracopoulos MB, Pandiora A, Fouzas S, Panagiotopoulou E, Liolios E, Priftis KN: **Sex-specific trends in prevalence of childhood asthma over 30 years in Patras, Greece.** *Acta Paediatr* 2011, **100**:1000-1005.
76. Anthracopoulos MB, Fouzas S, Pandiora A, Panagiotopoulou E, Liolios E, Priftis KN: **Prevalence trends of rhinoconjunctivitis, eczema, and atopic asthma in Greek schoolchildren: four surveys during 1991-2008.** *Allergy Asthma Proc* 2011, **32**:56-62.
77. Burr ML, Butland BK, King S, Vaughan-Williams E: **Changes in asthma prevalence: two surveys 15 years apart.** *Arch Dis Child* 1989, **64**:1452-1456.

78. Weitzman M, Gortmaker SL, Sobol AM, Perrin JM: **Recent trends in the prevalence and severity of childhood asthma.** *JAMA* 1992, **268**:2673-2677.
79. Chittleborough CR, Taylor AW, Dal Grande E, Gill TK, Grant JF, Adams RJ, Wilson DH, Ruffin RE, Team NWAHS: **Gender differences in asthma prevalence: Variations with socioeconomic disadvantage.** *Respirology* 2010, **15**:107-114.
80. Ekici A, Ekici M, Kocyigit P, Karlidag A: **Prevalence of Self-Reported Asthma in Urban and Rural Areas of Turkey.** *J Asthma* 2012, **49**:522-526.
81. Broms K, Norback D, Eriksson M, Sundelin C, Svardsudd K: **Prevalence and co-occurrence of parentally reported possible asthma and allergic manifestations in pre-school children.** *Bmc Public Health* 2013, **13**.
82. Clifford RD, Radford M, Howell JB, Holgate ST: **Prevalence of respiratory symptoms among 7-year-old and 11-year-old schoolchildren and association with asthma.** *Arch Dis Child* 1989, **64**:1118-1125.
83. Arif AA, Delclos GL, Lee ES, Tortolero SR, Whitehead LW: **Prevalence and risk factors of asthma and wheezing among US adults: an analysis of the NHANES III data.** *Eur Respir J* 2003, **21**:827-833.
84. Oraka E, King ME, Callahan DB: **Asthma and Serious Psychological Distress Prevalence and Risk Factors Among US Adults, 2001-2007.** *Chest* 2010, **137**:609-616.
85. Ma J, Xiao L, Knowles SB: **Obesity, insulin resistance and the prevalence of atopy and asthma in US adults.** *Allergy* 2010, **65**:1455-1463.
86. Akinbami LJ, Lynch CD, Parker JD, Woodruff TJ: **The association between childhood asthma prevalence and monitored air pollutants in metropolitan areas, United States, 2001-2004.** *Environ Res* 2010, **110**:294-301.
87. Akinbami LJ, Moorman JE, Liu X: **Asthma prevalence, health care use, and mortality: United States, 2005-2009.** *National health statistics reports* 2011:1-14.
88. Akinbami LJ, Moorman JE, Bailey C, Zahran HS, King M, Johnson CA, Liu X: **Trends in asthma prevalence, health care use, and mortality in the United States, 2001-2010.** *NCHS data brief* 2012:1-8.
89. Zahran HS, Bailey C, Garbe P: **Vital Signs: Asthma Prevalence, Disease Characteristics, and Self-Management Education-United States, 2001-2009 (Reprinted from MMWR, vol 60, pg 547-552, 2011).** *JAMA* 2011, **305**:2514-2516.
90. Moorman JE, Zahran H, Truman BI, Molla MT, Centers for Disease C, Prevention: **Current asthma prevalence - United States, 2006-2008.** *Morbidity and mortality weekly report Surveillance summaries (Washington, DC : 2002)* 2011, **60 Suppl**:84-86.
91. Frazier JC, Loveland KM, Zimmerman HJ, Helgerson SD, Harwell TS: **Prevalence of Asthma Among Adults in Metropolitan Versus Nonmetropolitan Areas in Montana, 2008.** *Prev Chronic Dis* 2012, **9**.

92. Coker TR, Kaplan RM, Chung PJ: **The Association of Health Insurance and Disease Impairment with Reported Asthma Prevalence in U.S. Children.** *Health Serv Res* 2012, **47**:431-445.
93. Musafiri S, van Meerbeeck J, Musango L, Brusselle G, Joos G, Seminega B, Rutayisire C: **Prevalence of atopy, asthma and COPD in an urban and a rural area of an African country.** *Respir Med* 2011, **105**:1596-1605.
94. Rodriguez A, Vaca M, Oviedo G, Erazo S, Chico ME, Teles C, Barreto ML, Rodrigues LC, Cooper PJ: **Urbanisation is associated with prevalence of childhood asthma in diverse, small rural communities in Ecuador.** *Thorax* 2011, **66**:1043-1050.
95. Duggan EM, Sturley J, Fitzgerald AP, Perry IJ, Hourihane JOB: **The 2002-2007 trends of prevalence of asthma, allergic rhinitis and eczema in Irish schoolchildren.** *Pediatr Allergy Immunol* 2012, **23**:464-471.
96. Anderson HR, Butland BK, Strachan DP: **Trends in prevalence and severity of childhood asthma.** *Br Med J* 1994, **308**:1600-1604.
97. Jain A, Bhat HV, Acharya D: **Prevalence of Bronchial Asthma in Rural Indian Children: A Cross Sectional Study from South India.** *Indian J Pediatr* 2010, **77**:31-35.
98. Sanchez-Lerma B: **High Prevalence of Asthma and Allergic Diseases in Children Aged 6 and 7 Years From the Canary Islands: The International Study of Asthma and Allergies in Childhood (vol 19, pg 383, 2009).** *J Investig Allergol Clin Immunol* 2012, **22**:79-79.
99. Luna MdFGd, Almeida PCd, Silva MGCd: **Asthma and rhinitis prevalence and co-morbidity in 13-14-year-old schoolchildren in the city of Fortaleza, Ceara State, Brazil.** *Cad Saude Publica* 2011, **27**:103-112.
100. de Luna MdFG, Fischer GB, de Luna JRG, da Silva MGC, de Almeida PC, Chiesa D: **Prevalences of asthma and rhinitis among adolescents in the city of Fortaleza, Brazil: temporal changes.** *J Bras Pneumol* 2013, **39**:128-137.
101. Matos Povoas Juca SCB, Takano OA, Lacerda Moraes LS, Guimaraes LV: **Asthma prevalence and risk factors in adolescents 13 to 14 years of age in Cuiaba, Mato Grosso State, Brazil.** *Cad Saude Publica* 2012, **28**:689-697.
102. Robinson CL, Baumann LM, Gilman RH, Romero K, Manuel Combe J, Cabrera L, Hansel NN, Barnes K, Gonzalez G, Wise RA, et al: **The Peru Urban versus Rural Asthma (PURA) Study: methods and baseline quality control data from a cross-sectional investigation into the prevalence, severity, genetics, immunology and environmental factors affecting asthma in adolescence in Peru.** *Bmj Open* 2012, **2**.
103. Delmas MC, Guignon N, Leynaert B, Annesi-Maesano I, Com-Ruelle L, Gonzalez L, Fuhrman C: **Prevalence and control of asthma in young children in France.** *Rev Mal Respir* 2012, **29**:688-696.
104. Burney P, Chinn S, Luczynska C, Jarvis D, Vermeire P, Bousquet J, Nowak D, Prichard J, deMarco R, Rijcken B, et al: **Variations in the prevalence of respiratory symptoms, self-reported asthma**

- attacks, and use of asthma medication in the European community respiratory health survey (ECRHS).** *Eur Respir J* 1996, **9**:687-695.
105. Julia-Serda G, Cabrera-Navarro P, Acosta-Fernandez O, Martin-Perez P, Losada-Cabrera P, Garcia-Bello MA, Carrillo-Diaz T, Anto-Boque J: **High prevalence of asthma and atopy in the Canary Islands, Spain.** *Int J Tuberc Lung Dis* 2011, **15**:536-541.
106. Mahboub BH, Al-Hammadi S, Rafique M, Sulaiman N, Pawankar R, Al Redha AI, Mehta AC: **Population prevalence of asthma and its determinants based on European Community Respiratory Health Survey in the United Arab Emirates.** *Bmc Pulmonary Medicine* 2012, **12**.
107. Alves GdC, Santos DN, Feitosa CA, Barreto ML: **Community violence and childhood asthma prevalence in peripheral neighborhoods in Salvador, Bahia State, Brazil.** *Cad Saude Publica* 2012, **28**:86-94.
108. Akinbami LJ, Schoendorf KC: **Trends in childhood asthma: Prevalence, health care utilization, and mortality.** *Pediatrics* 2002, **110**:315-322.
109. Agrawal S: **Effect of Indoor Air Pollution from Biomass and Solid Fuel Combustion on Prevalence of Self-Reported Asthma among Adult Men and Women in India: Findings from a Nationwide Large-Scale Cross-Sectional Survey.** *J Asthma* 2012, **49**:355-365.
110. Agrawal S, Pearce N, Ebrahim S: **Prevalence and risk factors for self-reported asthma in an adult Indian population: a cross-sectional survey.** *Int J Tuberc Lung Dis* 2013, **17**:275-282.
111. Burney PGJ, Chinn S, Rona RJ: **Has the prevalence of asthma increased in children - evidence from the national study of health and growth 1973-86.** *Br Med J* 1990, **300**:1306-1310.
112. Krstic G: **Asthma Prevalence Associated with Geographical Latitude and Regional Insolation in the United States of America and Australia.** *Plos One* 2011, **6**.
113. Sousa CA, Cesar CLG, Barros MBdA, Carandina L, Goldbaum M, Pereira JCR: **Prevalence of asthma and risk factors associated: population based study in Sao Paulo, Southeastern Brazil, 2008-2009.** *Rev Saude Publica* 2012, **46**:825-833.
114. Moreira SM, Ribeiro ACG, Fonseca M, Lourenco O, Taborda-Barata L: **Comparative study of the prevalence, clinical features, sensitisation profiles and risk factors for Bronchial Asthma between elderly and young adults in Cova da Beira Portugal.** *Eur J Med Res* 2010, **15**:216-216.
115. Parasuramalu BG, Huliraj N, Rudraprasad BM, Prashanth Kumar SP, Ramesh Masthi NR, Gangaboraiah: **Prevalence of bronchial asthma and its association with smoking habits among adult population in rural area.** *Indian J Public Health* 2010, **54**:165-168.
116. Woolcock AJ, Peat JK, Salome CM, Yan K, Anderson SD, Schoeffel RE, McCowage G, Killalea T: **Prevalence of bronchial hyperresponsiveness and asthma in a rural adult-population** *Thorax* 1987, **42**:361-368.

117. Cornell AG, Mellins RB, Acosta LM, Rundle AG, Miller RL, Kinney PL, Yan B, Perera FP, Jacobson JS, Goldstein IF, et al: **Exhaled No Is Elevated With Exposure To Black Carbon And Dust Mite Allergen Among 7 And 8-Year-Old Children Living In High And Low Asthma Prevalence Neighborhoods In New York City.** *Am J Respir Crit Care Med* 2011, **183**.
